# Supplementary material for: Carnosic Acid against Lung Cancer: Induction of Autophagy and Activation of Sestrin-2/LKB1/AMPK Signalling
Source: MDPI journal article supplement (doi:10.3390/ijms25041950), 2024-02-06
Supplement: s1 [file s1]

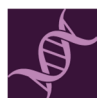

Supplementary

## Carnosic acid against lung cancer: induction of autophagy and activation of Sestrin-2/LKB1/AMPK signalling

Eric J. O'Neill <sup>1</sup>, Newman Siu Kwan Sze<sup>1</sup>, Rebecca E. K. MacPherson<sup>1</sup> and Evangelia Tsiani <sup>1,\*</sup>

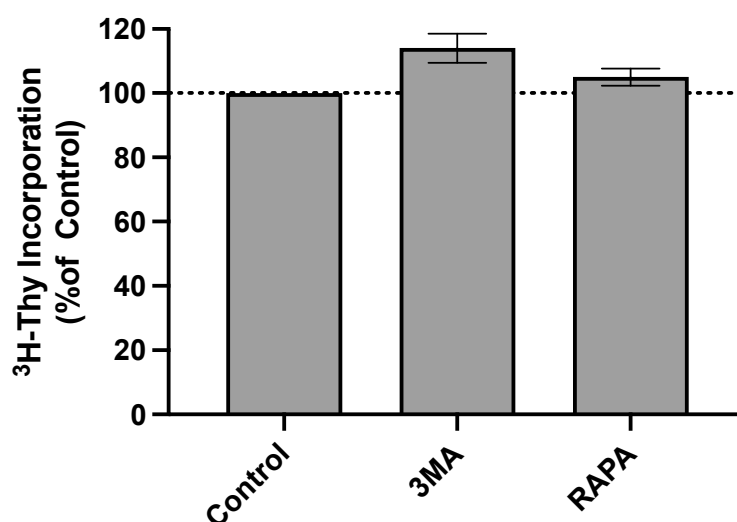

**Figure S1.** Effect of 3-methyladenine (3MA) and rapamycin (RAPA) on <sup>3</sup>H-thymidine incorporation in H1299 cells. H1299 cells were pretreated for 1 h with autophagy inhibitor 3-methyladenine (3MA; 5 mM) or rapamycin (RAPA; 200 nM) followed by exposure to <sup>3</sup>H-thymidine for 24 h. Cells were lysed, and radioactivity measured using liquid scintillation counting. Data are the mean ± SEM for 3 individual experiments expressed as a percentage of control.
